# Supplementary material for: Self-assembled polar hole-transport monolayer for high-performance perovskite photodetectors
Source: Royal Society of Chemistry journal article supplement (doi:10.1039/d1tc00433f), 2021-01-01
Supplement: d1tc00433f1.pdf [file d1tc00433f1.pdf]

## Supplementary Information

### Self-Assembled Polar Hole Transport Monolayer for High-Performance Perovskite Photodetectors

Jia-Yu Lin<sup>a</sup>, Fang-Chi Hsu<sup>b,\*</sup>, Chi-Yuan Chang<sup>a</sup>, and Yang-Fang Chen<sup>a,\*</sup>

<sup>a</sup>Department of Physics, National Taiwan University, Taipei 106, Taiwan.

<sup>b</sup>Department of Materials Science and Engineering, National United University, Miaoli 360, Taiwan.

#### Contents

S1. UV-vis spectra corresponding to different thicknesses of P3HT-COOH films

S2. Performance of MAPbI<sub>3</sub> solar cells with different HTLs

## S1. UV-vis spectra corresponding to different thicknesses of P3HT-COOH films

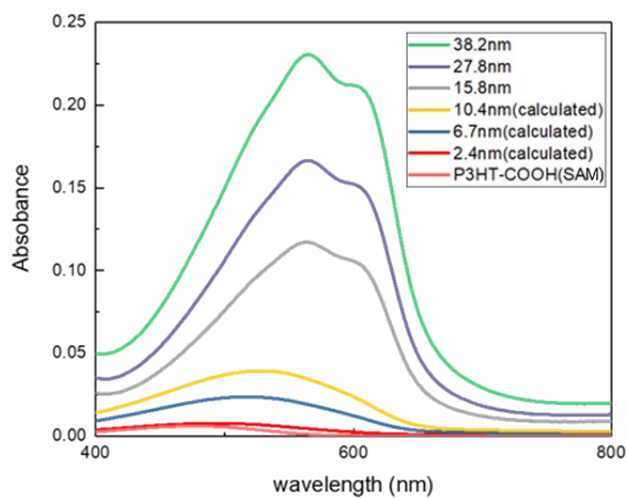

Fig. S1 UV-vis absorbance corresponding to different thicknesses of P3HT-COOH films.

## S2. Performance of MAPbI<sub>3</sub> solar cells with different HTLs

Fig. S2 presents the photocurrent density ( $J$ ) – voltage ( $V$ ) curves of the best MAPbI<sub>3</sub> devices using PEDOT:PSS, spin-coated P3HT-COOH, and self-assembled P3HT-COOH HTLs under AM 1.5G one sun illumination and the corresponding device performance parameters over 20 cells were summarized in Table S1.

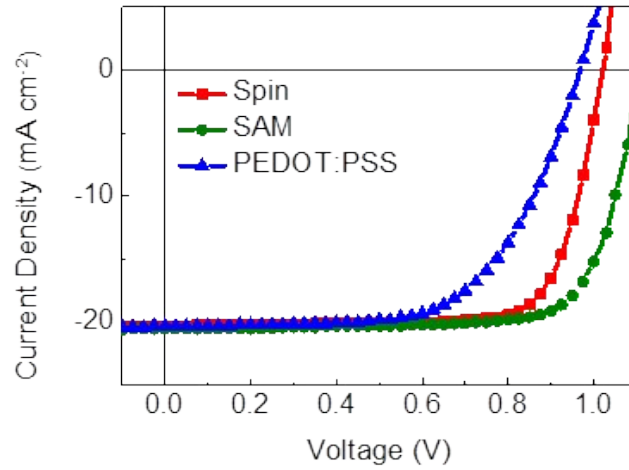

Fig. S2 Current density – voltage ( $J - V$ ) curves of perovskite solar cells under one sun illumination (AM 1.5G) .

Table S1 Summary of device performance parameters under one sun condition with AM 1.5G filter. The values in the parenthesis denote the values for the best device.

| Device    | Jsc (mA cm <sup>-2</sup> ) | Voc (V)       | FF (%)       | PCE (%)      |
|-----------|----------------------------|---------------|--------------|--------------|
| Spin      | 20.23 ± 0.19               | 1.030 ± 0.001 | 76.24 ± 0.33 | 15.78 ± 0.04 |
|           | (20.30)                    | (1.028)       | (76.44)      | (15.81)      |
| SAM       | 20.48 ± 0.01               | 1.098 ± 0.001 | 76.66 ± 0.24 | 17.19 ± 0.03 |
|           | (20.50)                    | (1.099)       | (76.81)      | (17.21)      |
| PEDOT:PSS | 20.15 ± 0.25               | 0.970 ± 0.015 | 62.57 ± 0.35 | 12.12 ± 0.09 |
|           | (20.30)                    | (0.968)       | (62.46)      | (12.25)      |
